# Supplementary material
Source: PubMed Central journal article supplement (PMC7156962)
Supplement: EMBJ-39-e104246-s001.pdf [file EMBJ-39-e104246-s001.pdf]

Nelson *et al.*, Phosphoproteomics reveals conserved nodes and regulation of store-operated calcium entry by AMPK

## Appendix

| <b>Table of Contents</b>           | <b>Page</b> |
|------------------------------------|-------------|
| <a href="#">Appendix Figure S1</a> | 1           |
| <a href="#">Appendix Figure S2</a> | 2           |
| <a href="#">Appendix Figure S3</a> | 3           |
| <a href="#">Appendix Figure S4</a> | 4           |
| <a href="#">Appendix Figure S5</a> | 6           |
| <a href="#">Appendix Figure S6</a> | 7           |
| <a href="#">Appendix Table S1</a>  | 8           |

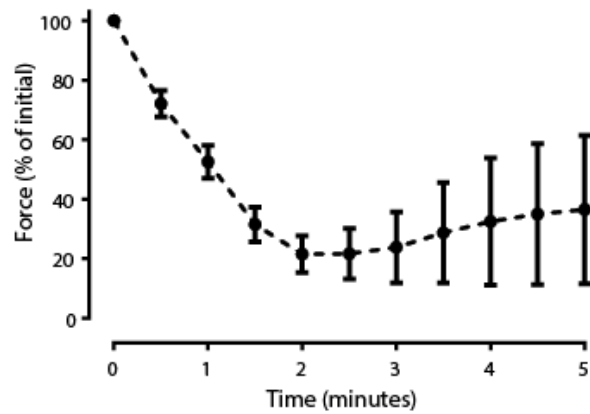

**Appendix Figure S1.** Contraction force measurements during electrical stimulation of rat tibialis anterior muscle (100 Hz for 5 min; 1 sec on followed by 3 sec off). n=5. Data are represented as mean  $\pm$  SD. Related to Figure 1.

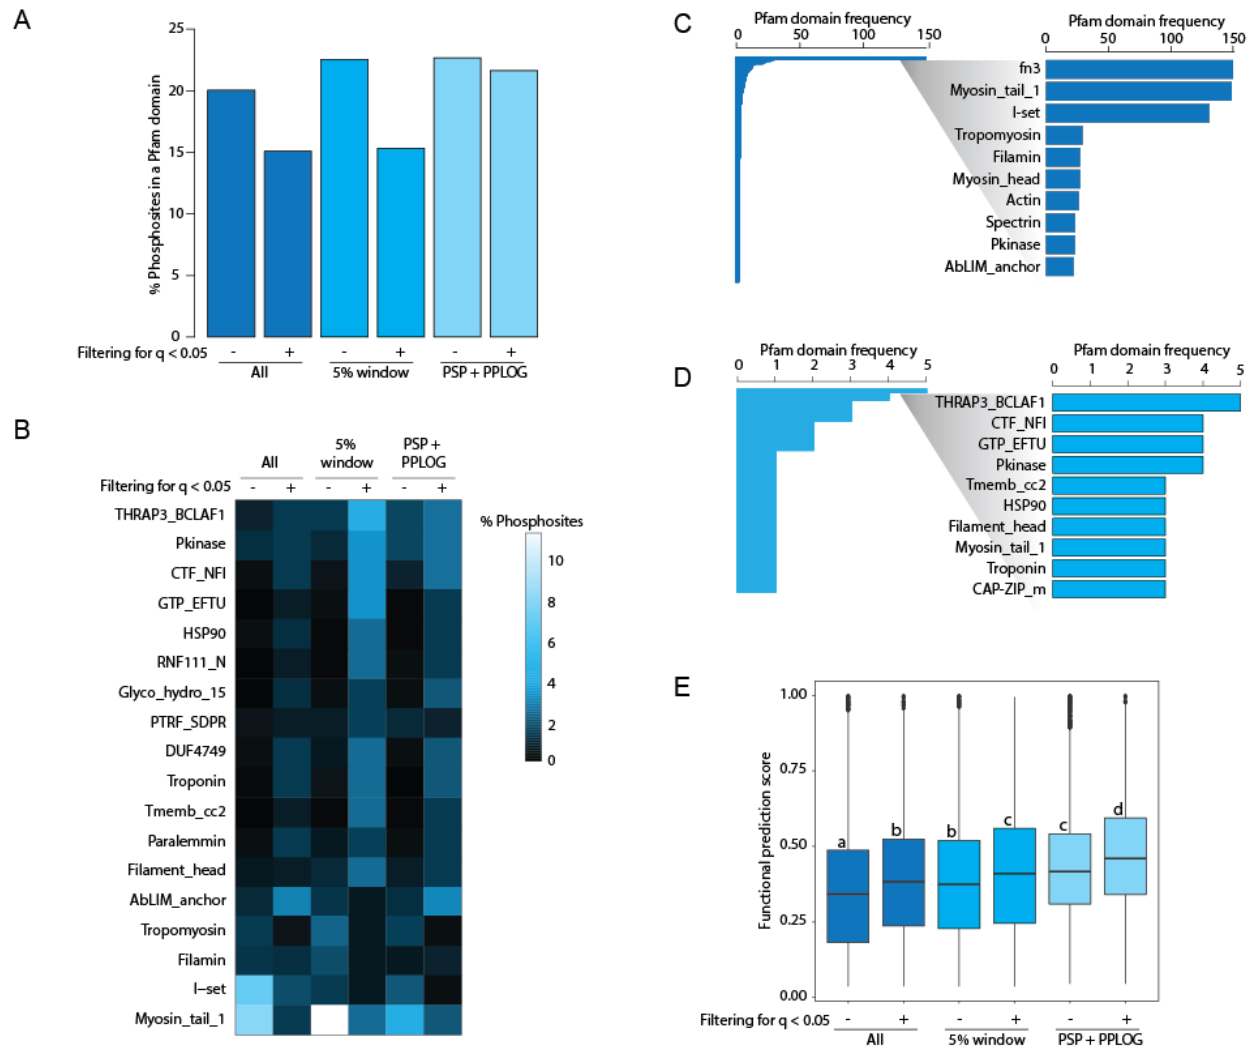

**Appendix Figure S2.** Orthologous and significantly regulated phosphosites have more frequent attributes of functional phosphosites. **A)** The percentage of phosphosites occurring within a Pfam defined domain. The groups are all identified phosphosites in the human phosphoproteome, phosphosites that fit a 5% window with the rat or mouse datasets and phosphosites with an ortholog in the rat or mouse dataset found by PhosphositePlus or PhosphOrtholog. Further filtering for significantly regulated phosphosites ( $q < 0.05$ ) was also applied to each group. **B)** The percentage of phosphosites in the 10 most common domains from each group. Examples of the distribution and top domains of **C)** all phosphosites and **D)** 5% window-filtered significantly regulated phosphosites. **E)** The functional prediction score (Ochoa et al., 2019) of the separate groups. Welch's ANOVA  $p < 0.05$ . Groups with the same letter are not significantly different ( $p < 0.05$ , Games-Howell post-hoc test).

|             |      |            |              |                    |              |            |              |                |              |           |                    |          |              |               |              |            |     |      |      |
|-------------|------|------------|--------------|--------------------|--------------|------------|--------------|----------------|--------------|-----------|--------------------|----------|--------------|---------------|--------------|------------|-----|------|------|
| STBD1_HUMAN | 164- | KAATCFAEKL | <sup>Ⓟ</sup> | PSSNLLKNRAKEEMSL   | <sup>Ⓟ</sup> | SDLNSQDRVD | <sup>Ⓟ</sup> | <u>HEEWEMV</u> | <sup>Ⓟ</sup> | PRHSSWGDV | GVGGSLKAPVLNLNQGMN | GRS      | -237         |               |              |            |     |      |      |
| STBD1_RAT   | 151- | KVAGSVAEKL |              | PSSSPLMDRAEAA----- |              | SLAQ       | <sup>Ⓟ</sup> | SAGHEDWEV      | <sup>Ⓟ</sup> | SRHSSWGS  | <sup>Ⓟ</sup>       | VGLGG    | <sup>Ⓟ</sup> | LEASRLSLNQGMD | ESRN         | -218       |     |      |      |
| STBD1_MOUSE | 156- | KVAGSVAAKL | <sup>Ⓟ</sup> | PSSSLLVDR          |              | AKAV-----  |              | SQ-DQ          | <sup>Ⓟ</sup> | AGHEDWEV  | <sup>Ⓟ</sup>       | SRHSSWGS | <sup>Ⓟ</sup> | VGLGG         | <sup>Ⓟ</sup> | LEASRLSLNQ | RMD | DSTN | -222 |

**Appendix Figure S3.** Human exercise-, rat contraction- or mouse running-regulated phosphosites on Genethonin 1 (starch-binding domain-containing protein 1; STBD1). Underlined is the Atg8 interacting motif (AIM). Related to Figure 2.

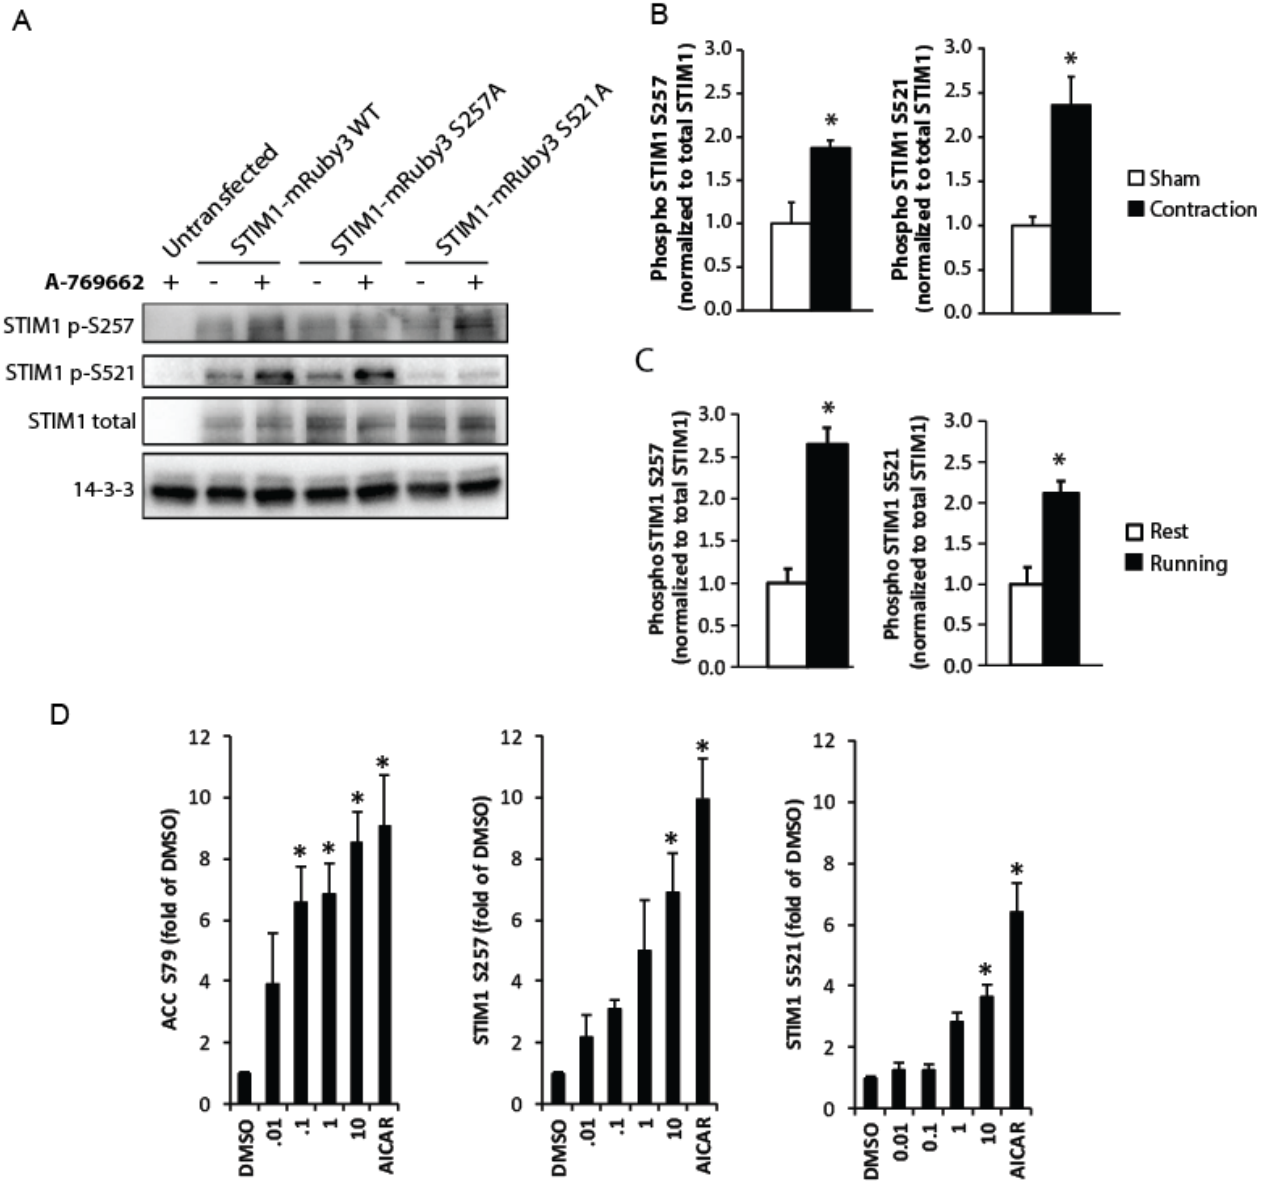

**Appendix Figure S4. (A)** Western blots for phosphorylated STIM1 (S257 or S521) in HEK-E cells not transfected, or expressing STIM1-mRuby3 WT, S257A or S521A. Cells were treated with the AMPK activator A-769662 (+) or vehicle (-) for 30 min. Total STIM1 was used to determine expression of STIM1-mRuby3 WT or mutants, and 14-3-3 was used as a loading control. Quantification of Western blots from **(B)** rat skeletal muscle subjected to sham or contraction, or **(C)** skeletal muscle from mice subjected to rest or treadmill running. \* =  $p < 0.05$  for exercise compared to respective control, student's t-test. **(D)** Quantification of Western blots from L6 myoblasts treated with DMSO, increasing concentrations of thapsigargin (.01, .1, 1 or 10  $\mu\text{M}$ ), or .5 mM AICAR for 15 min. \* =  $p < 0.05$  compared to DMSO control, one-way ANOVA with Tukey's post-hoc test. For B-D, data are represented as mean  $\pm$  SEM. Related to Figure 3.

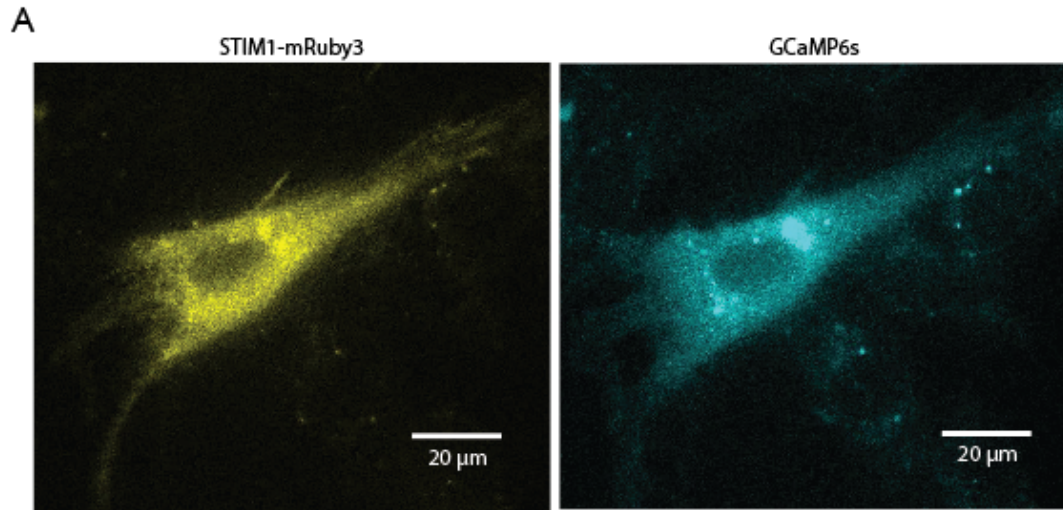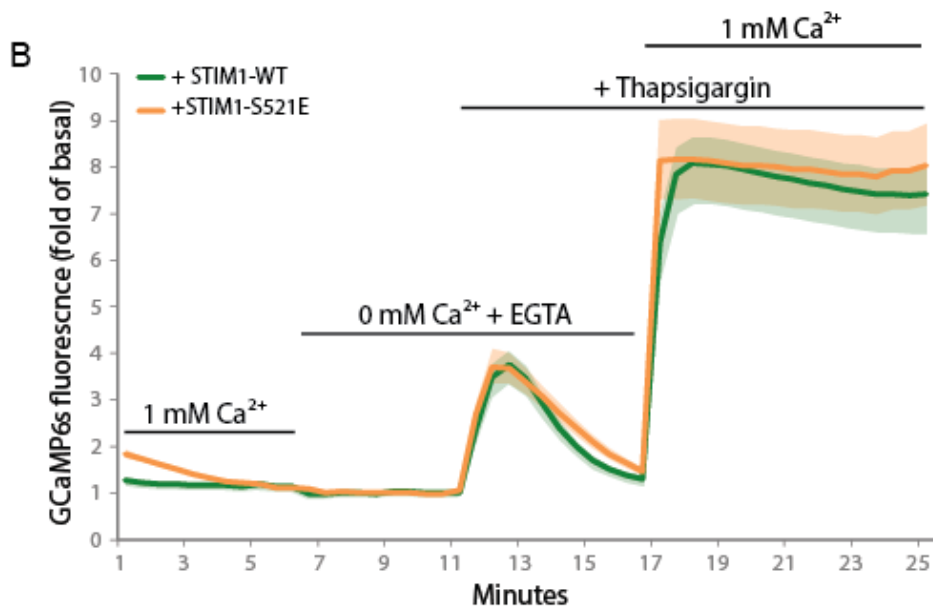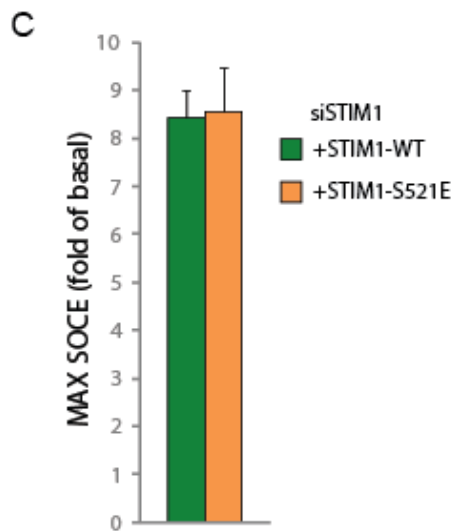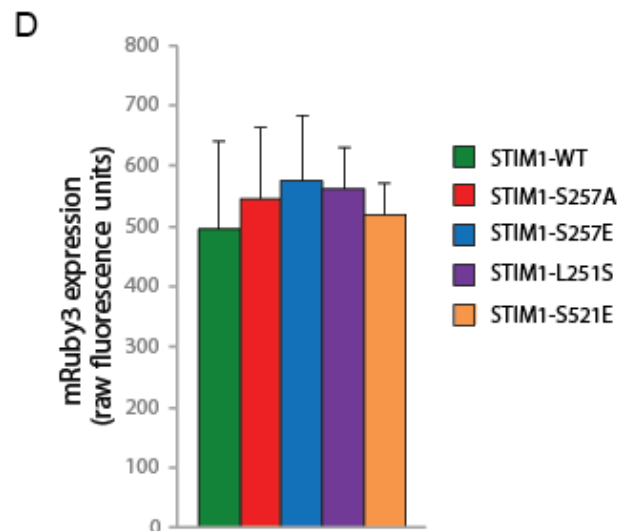

**Appendix Figure S5.** L6 myoblasts were transfected with the genetic cytosolic Ca<sup>2+</sup> sensor GCaMP6s. Cells were also transfected with siRNA directed at endogenous STIM1 (siSTIM) and full-length wild type (WT) or mutant (S521E) STIM1-mRuby3. **(A)** Representative images of an L6 myoblast co-expressing STIM1-mRuby3 (left) and GCaMP6s (right). **(B)** Ca<sup>2+</sup> levels over time (fold of 0 mM Ca<sup>2+</sup> + EGTA basal) and **(C)** quantification of store-operated Ca<sup>2+</sup> entry in L6 myoblasts incubated in buffer containing 1 or 0 mM Ca<sup>2+</sup> and treated with 2 μM thapsigargin during the indicated times. These WT data are duplicated from Figure 5 B-C to compare S521E. **(D)** STIM1-mRuby3 expression measured via fluorescence microscopy. Data are represented as mean ± SEM. Related to Figure 5.

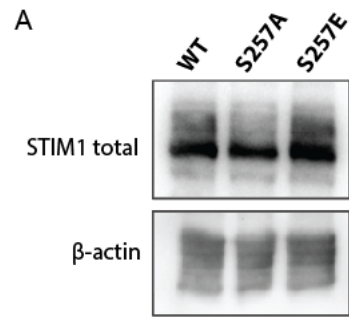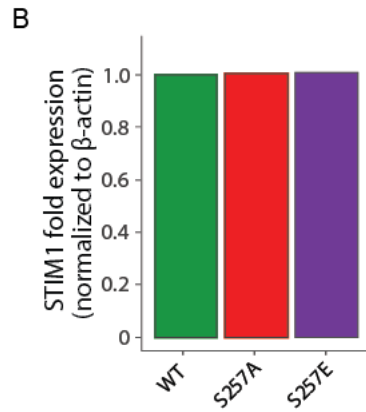

**Appendix Figure S6. (A)** Western blots and **(B)** quantification for total STIM1 in STIM whole-body knockout flies overexpressing WT or mutant (S257A or S257E human STIM1-mRuby3).  $\beta$ -actin was used as a loading control. Related to Figure 6.



**Appendix Table S1.** Conserved exercise-regulated phosphosites.

| GeneNames | Human UniProt-Site | Rat UniProt-Site | Mouse UniProt-Site | Human Exercise | Rat Contraction | Mouse Running |
|-----------|--------------------|------------------|--------------------|----------------|-----------------|---------------|
| AKAP13    | Q12802-S2563       | F1M3G7-S2511     | E9Q394-S2527       | ▲              | ▲               | ▲             |
| ALPK3     | Q96L96-S1390       | D3ZH28-S1169     | D3YUT2-S1165       | ▼              | ▲               | ▼             |
| ALPK3     | Q96L96-S1406       | D3ZH28-S1185     | D3YUT2-S1181       | ▼              | ▼               | ▼             |
| ALPK3     | Q96L96-T1409       | D3ZH28-T1188     | D3YUT2-T1184       | ▼              | ▲               | ▼             |
| AMPD1     | P23109-S118        | P10759-S85       | Q3V1D3-S83         | ▲              | ▲               | ▼             |
| C18orf25  | Q96B23-S147        | D4A3X1-S147      | Q8BH50-S147        | ▲              | ▲               | ▲             |
| C18orf25  | Q96B23-S67         | D4A3X1-S67       | Q8BH50-S67         | ▲              | ▲               | ▲             |
| CAMK2G    | Q13555-S311        | P11730-S311      | Q923T9-S311        | ▲              | ▲               | ▼             |
| CLASP2    | O75122-S313        | Q99JD4-S319      | Q8BRT1-S319        | ▲              | ▲               | ▲             |
| CLCN1     | P35523-S886        | P35524-S892      | Q64347-S892        | ▲              | ▲               | ▼             |
| CRYAB     | P02511-S59         | P23928-S59       | P23927-S59         | ▲              | ▲               | ▲             |
| EIF4B     | P23588-S497        | Q5RKG9-S497      | Q8BGD9-S497        | ▲              | ▲               | ▲             |
| EIF4G1    | Q04637-S1097       | D3ZU13-S1099     | Q6NZJ6-S1101       | ▼              | ▼               | ▲             |
| FAM65A    | Q6ZS17-S22         | Q4FZU8-S22       | Q68FE6-S22         | ▲              | ▼               | ▼             |
| FLNC      | Q14315-S2624       | D3ZHA0-S2625     | Q8VHX6-S2625       | ▲              | ▲               | ▲             |
| GPHN      | Q9NQX3-S305        | Q03555-S337      | Q8BUV3-S338        | ▲              | ▲               | ▲             |
| HNRNPA3   | P51991-S116        | Q6URK4-S116      | Q8BG05-S116        | ▲              | ▲               | ▼             |
| HSPB1     | P04792-S15         | P42930-S15       | P14602-S15         | ▲              | ▲               | ▲             |
| HSPB1     | P04792-S82         | P42930-S86       | P14602-S86         | ▲              | ▲               | ▲             |
| LMOD2     | Q6P5Q4-S392        | A1A5Q0-S398      | Q3UHZ5-S399        | ▲              | ▲               | ▼             |
| LMOD2     | Q6P5Q4-S512        | A1A5Q0-S514      | Q3UHZ5-S515        | ▼              | ▼               | ▼             |
| LMOD2     | Q6P5Q4-T384        | A1A5Q0-T390      | Q3UHZ5-T391        | ▼              | ▲               | ▼             |
| LNPEP     | Q9UIQ6-S91         | P97629-S91       | Q8C129-S91         | ▲              | ▲               | ▲             |
| MAPT      | P10636-S713        | P19332-S707      | P10637-S688        | ▼              | ▼               | ▼             |
| MLLT4     | P55196-S1182       | O35889-S1189     | Q9QZQ1-S1182       | ▲              | ▲               | ▲             |
| MLLT4     | P55196-S1275       | O35889-S1282     | Q9QZQ1-S1275       | ▼              | ▼               | ▼             |
| MTDH      | Q86UE4-S298        | Q9Z1W6-S297      | Q80WJ7-S297        | ▲              | ▲               | ▲             |
| MTFR1L    | Q9H019-S103        | Q5XII9-S100      | Q9CWE0-S100        | ▲              | ▲               | ▲             |
| MTOR      | P42345-S1261       | P42346-S1261     | Q9JLN9-S1261       | ▲              | ▲               | ▲             |
| NDRG2     | Q9UN36-S338        | Q8VBU2-S338      | Q9QYG0-S338        | ▼              | ▼               | ▼             |
| NDRG2     | Q9UN36-T330        | Q8VBU2-T330      | Q9QYG0-T330        | ▼              | ▼               | ▼             |
| NFIX      | Q14938-S265        | O70189-S1        | P70257-S265        | ▲              | ▲               | ▲             |
| NFIX      | Q14938-S268        | O70189-S4        | P70257-S268        | ▼              | ▼               | ▼             |
| OSBPL11   | Q9BXB4-S181        | B5DF74-S192      | Q8C195-S186        | ▼              | ▼               | ▼             |
| PCM1      | Q15154-S1283       | G3V7E6-S1280     | Q9R0L6-S1280       | ▲              | ▲               | ▲             |
| PDE4A     | P27815-S346        | P54748-S333      | O89084-S333        | ▲              | ▲               | ▼             |
| PDHA1     | P08559-S232        | P26284-S232      | P35486-S232        | ▼              | ▼               | ▼             |
| PHC3      | Q8NDX5-S842        | D3ZS50-S689      | Q8CHP6-S840        | ▲              | ▲               | ▲             |
| PHKA1     | P46020-S972        | Q64649-S974      | P18826-S973        | ▼              | ▼               | ▼             |
| PHLDB1    | Q86UU1-S489        | D3ZNS1-S490      | Q6PDH0-S491        | ▼              | ▼               | ▼             |
| PLEC      | Q15149-S4613       | P30427-S4616     | Q9QXS1-S4620       | ▼              | ▼               | ▼             |
| PNN       | Q9H307-S66         | D3ZAY8-S66       | O35691-S66         | ▲              | ▲               | ▲             |
| PPP1R14A  | Q96A00-S26         | Q99MC0-S26       | Q91VC7-S26         | ▼              | ▼               | ▼             |
| PPP1R3C   | Q9UQK1-S33         | Q5U2R5-S33       | Q7TMB3-S33         | ▼              | ▼               | ▼             |
| PPP2R5A   | Q15172-S49         | D3ZDI7-S49       | Q6PD03-S49         | ▲              | ▲               | ▲             |
| PRKAA2    | P54646-S491        | Q09137-S491      | Q8BRK8-S491        | ▲              | ▲               | ▲             |
| PRKAB2    | Q43741-S108        | Q9QZH4-S107      | Q6PAM0-S107        | ▲              | ▲               | ▲             |
| RAPGEF2   | Q9Y4G8-S585        | F1M386-S585      | Q8CHG7-S585        | ▲              | ▼               | ▼             |
| RCSD1     | Q6JBY9-S127        | F1M4V3-S97       | Q3UZA1-S127        | ▲              | ▲               | ▲             |
| RPS6KB2   | Q9UBS0-S416        | D4AE24-S416      | Q9Z1M4-S416        | ▲              | ▲               | ▲             |
| RPTOR     | Q8N122-S722        | D3ZDU2-S722      | Q8K4Q0-S722        | ▲              | ▲               | ▲             |
| SPEG      | Q15772-S2109       | Q63638-S2114     | E9QQ25-S2114       | ▲              | ▲               | ▼             |
| STIM1     | Q13586-S257        | P84903-S257      | P70302-S257        | ▲              | ▲               | ▲             |
| STIM1     | Q13586-S521        | P84903-S521      | P70302-S521        | ▲              | ▲               | ▲             |
| STIM1     | Q13586-S575        | P84903-S575      | P70302-S575        | ▼              | ▼               | ▼             |
| SYNPO2    | Q9UMS6-S820        | D4A702-S818      | Q91YE8-S813        | ▲              | ▲               | ▲             |
| SYNPO2    | Q9UMS6-S902        | D4A702-S900      | Q91YE8-S895        | ▼              | ▼               | ▼             |
| TBC1D1    | Q86T10-S237        | D4A4U9-S231      | Q60949-S231        | ▲              | ▲               | ▲             |
| TFEB      | P19484-S109        | Q4KLM8-S168      | Q9R210-S108        | ▼              | ▼               | ▼             |
| TNS1      | Q9HBL0-S1269       | F1LN42-S1442     | E9Q0S6-S1423       | ▼              | ▼               | ▼             |
| TNS1      | Q9HBL0-S1297       | F1LN42-S1470     | E9Q0S6-S1451       | ▼              | ▼               | ▼             |
| VAPA      | Q9P0L0-S164        | Q9Z270-S164      | Q9WV55-S164        | ▲              | ▲               | ▼             |
| VAPA      | Q9P0L0-S219        | Q9Z270-S219      | Q9WV55-S219        | ▲              | ▲               | ▼             |
| VIPAS39   | Q9H9C1-S121        | Q5PQN6-S119      | Q8BGQ1-S119        | ▲              | ▲               | ▲             |
| XIRP1     | Q702N8-S295        | D4ABA9-S294      | E9QQ93-S295        | ▲              | ▲               | ▲             |
| XIRP1     | Q702N8-S529        | D4ABA9-S532      | E9QQ93-S533        | ▲              | ▲               | ▲             |
| XIRP1     | Q702N8-S684        | D4ABA9-S687      | E9QQ93-S688        | ▲              | ▲               | ▲             |
