# Supplementary material
Source: PubMed Central journal article supplement (PMC7156962)

### 3B: mouse running

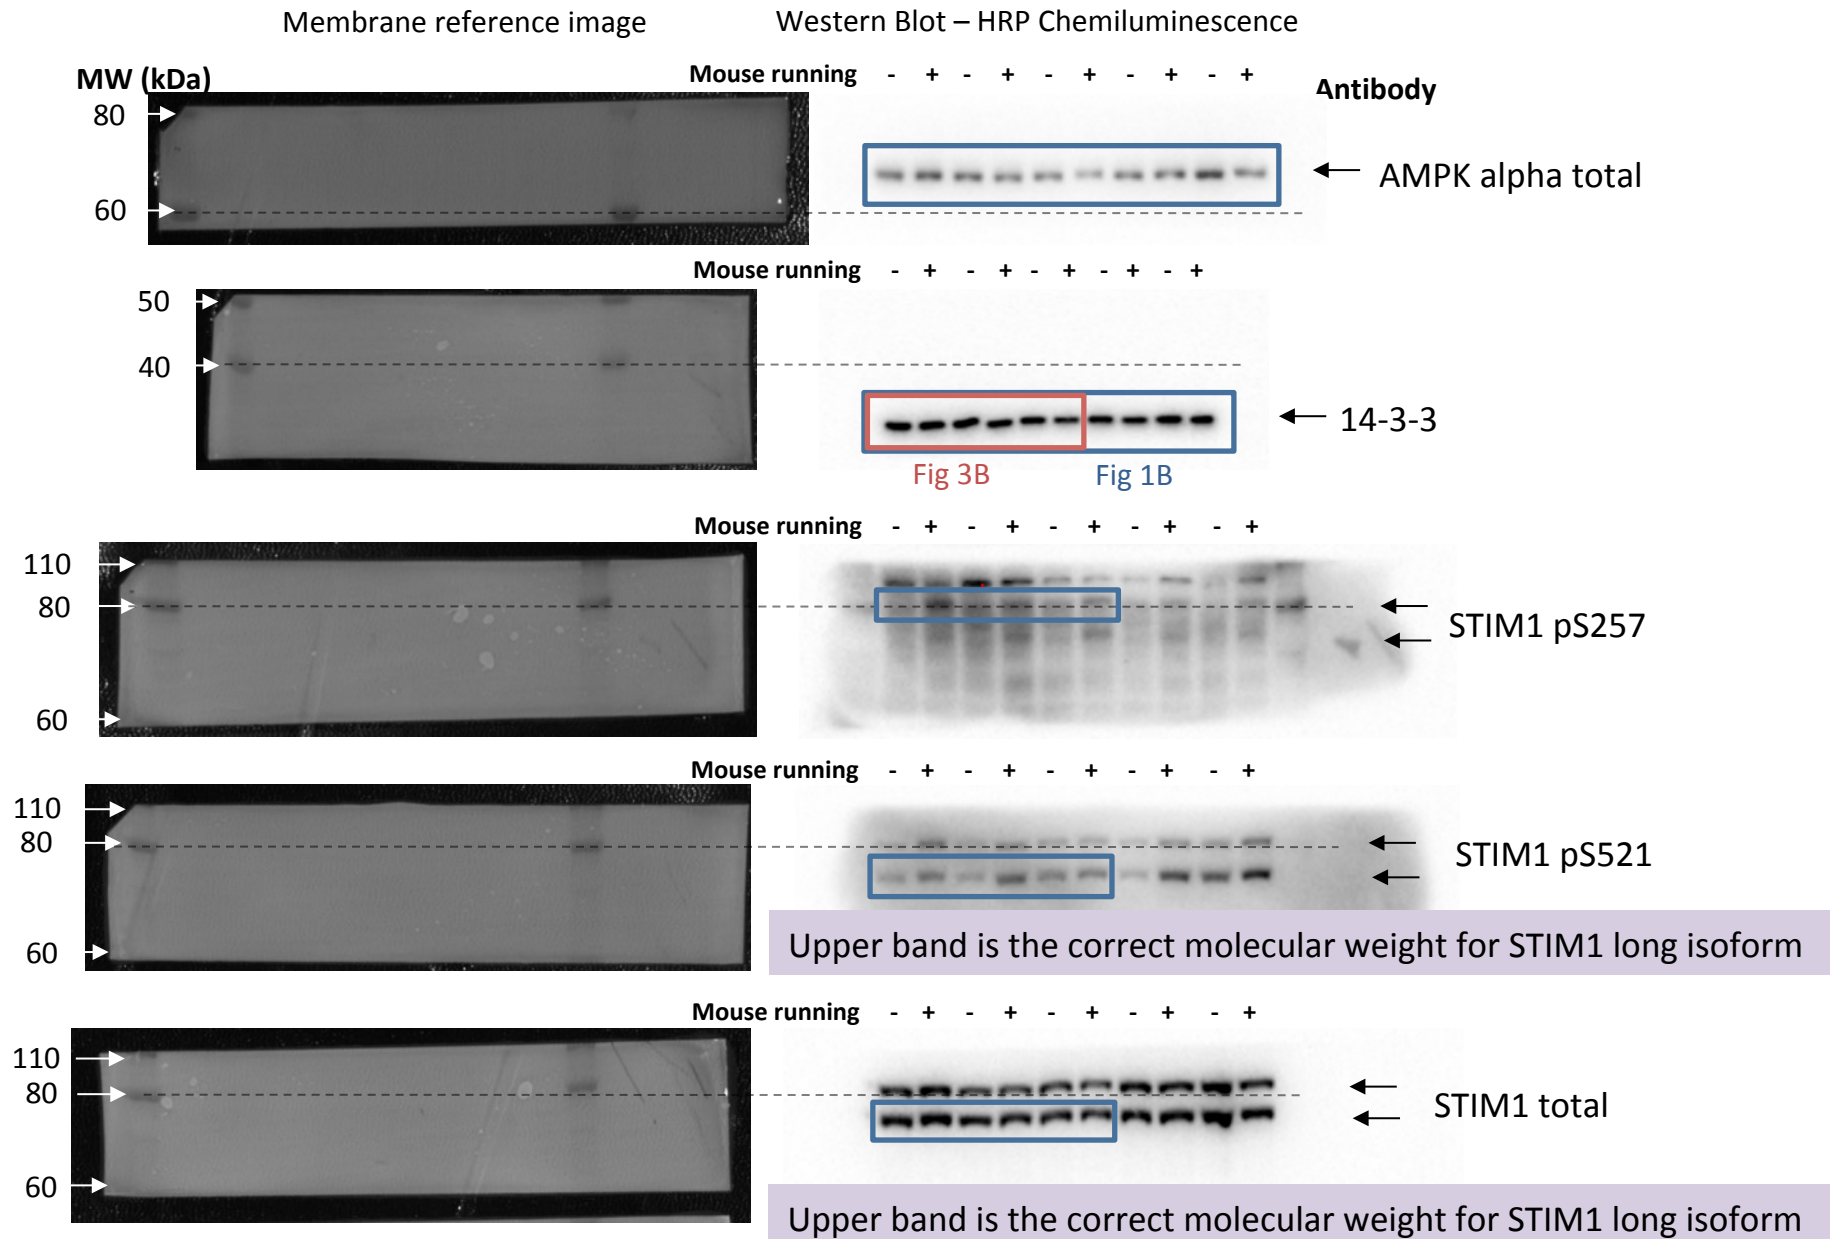

# Fig 3B: rat contraction

Western Blot – HRP Chemiluminescence

Novex Prestained protein standard:

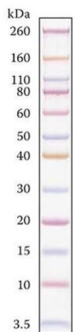

BioRad Precision Plus protein standard:

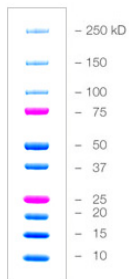

BioRad Kaleidoscope protein standard (for LICOR):

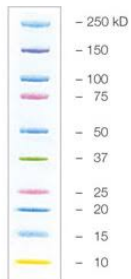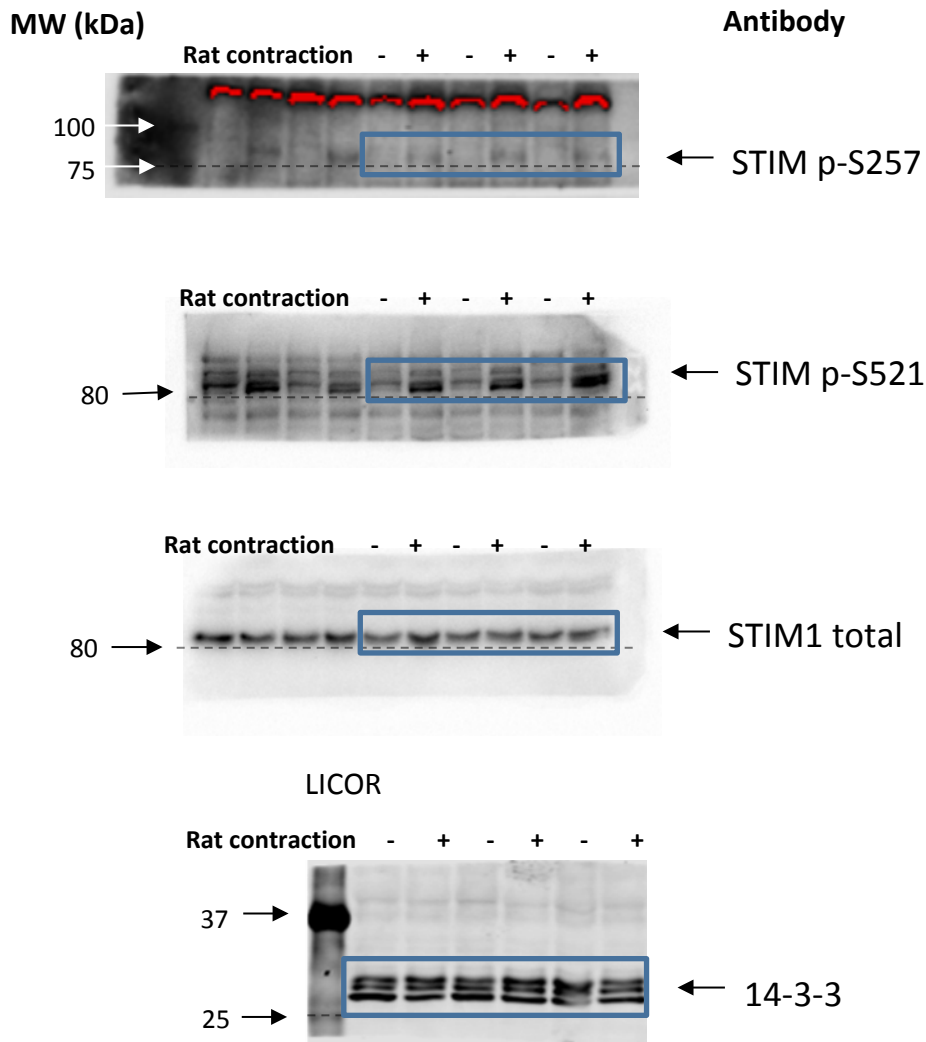

Fig 3E: in vitro kinase assay

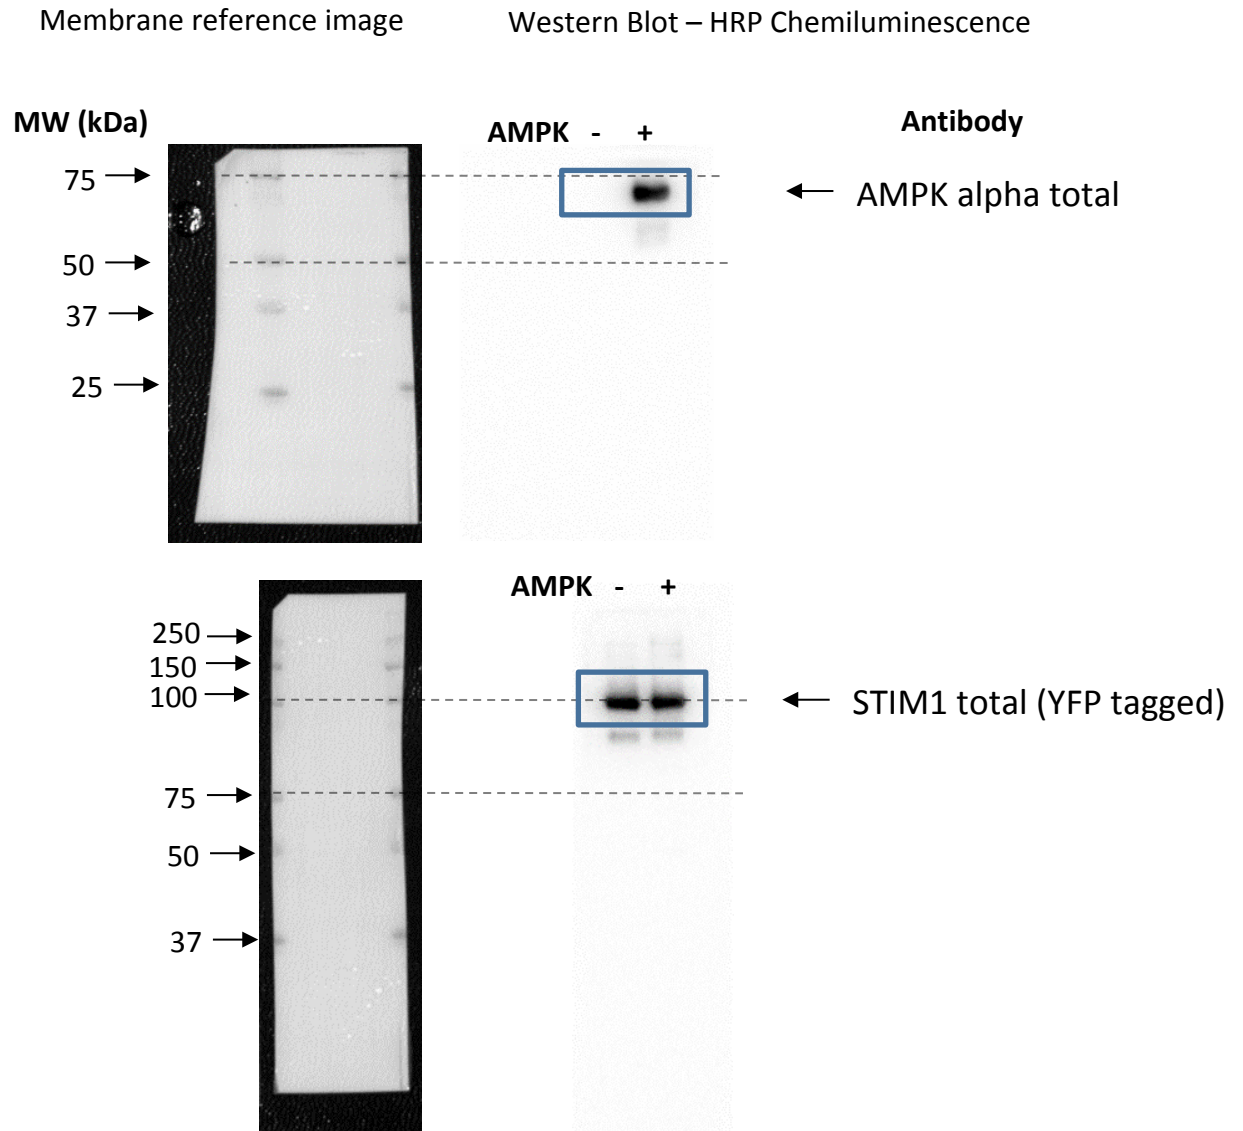

# Fig 3E: in vitro kinase assay (continued)

Membrane reference image

Western Blot – HRP Chemiluminescence

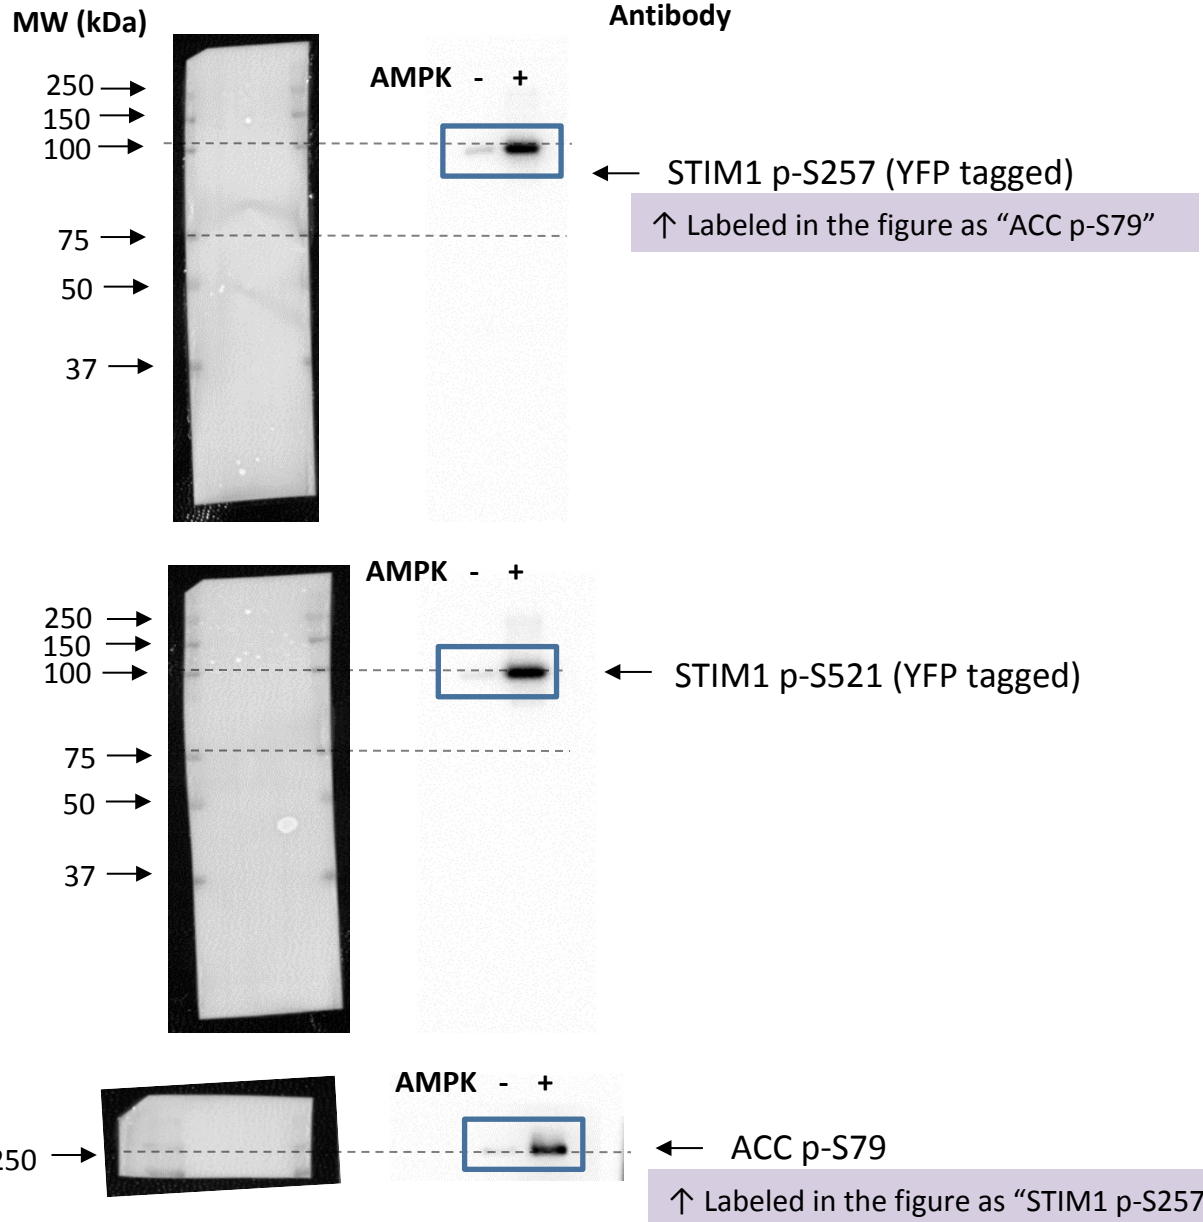

Supplement: EMBJ-39-e104246-s002.pdf [file EMBJ-39-e104246-s002.pdf]
